## 1. Submit—It's free

Submit manuscripts to [bioRxiv](#) and [medRxiv](#) free of charge.

## 2. Find new research

Find and read new research for free. Use [Advanced Search](#) to fine-tune your search queries and to search across both [bioRxiv](#) and [medRxiv](#).

## 3. Stay informed

Read [bioRxiv](#) and [medRxiv](#) blogs to know more about the servers. Sign up for alerts for automatic notifications about new preprints that match defined criteria. Follow specific preprints for updates.

## 4. Cite immediately

Cite your preprint right after it has been posted. Preprints receive a DOI and are indexed by services such as [Google Scholar](#) and [Crossref](#).

## 5. Learn from others

Access comments, peer and community reviews, media mentions, video presentations, and twitter discussions from the dashboard.

## 6. Improve & revise

Revise your preprint at any time until it is accepted for publication in a journal. Access previous versions in the [Info/History](#) tab.

## Common Questions

**Can I publish my work in a journal after I post it on [bioRxiv](#)/[medRxiv](#)?**

Yes! Most journals in biomedical sciences now consider work posted as preprints. We facilitate this process with a service that allows authors to directly transfer their manuscript to hundreds of partner journals.

**Can I get scooped if I post my research on [bioRxiv](#)/[medRxiv](#)?**

[bioRxiv](#)/[medRxiv](#) preprints are time-stamped with the date they were first posted. Therefore, authors can publicly make a priority claim. Also, several journals now have 'scoop protection' based on the preprint time-stamp to address these concerns.

**Can posting a preprint affect citations?**

[Google Scholar](#) merges the citation counts from your preprint and the final published article; therefore, the earlier you post a preprint, the sooner your citations will begin to accumulate.

**When should I post my manuscript on [bioRxiv](#)/[medRxiv](#)?**

Whenever you feel ready to share your research! Early posting may help you get feedback on your manuscript and increase the impact of your research.

**What if I find major errors after posting my [bioRxiv](#)/[medRxiv](#) preprint?**

You can correct all errors, big or small, by uploading a revision at any time prior to acceptance by a journal. If your work is undergoing peer review, please refer to journal policies about uploading revisions.

Find out more

[biorxiv.org](#)  
[medrxiv.org](#)

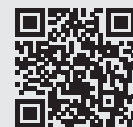

# bioRxiv

THE PREPRINT SERVER FOR BIOLOGY

**Preprints put authors in control**

- Share your work fast, when you want to
- Show your productivity

**Preprints help readers stay informed**

- Discover the latest research

# medRxiv

THE PREPRINT SERVER FOR HEALTH SCIENCES

*Communicate at the speed of science*

bioRxiv posts many COVID-19-related papers. A reminder: they have not been formally peer-reviewed and should not guide health-related behavior or be reported in the press as conclusive.

New Results Follow this preprint

**bioRxiv: the preprint server for biology**

Richard Sever, Ted Roeder, Samantha Hindle, Linda Sussman, Kevin-John Black, Janet Argentine, Wayne Manos, John R. Inglis

doi: <https://doi.org/10.1101/833400>

This article is a preprint and has not been certified by peer review [what does this mean?]

Abstract Full Text Info/History Metrics Preview PDF

**Abstract**

The traditional publication process delays dissemination of new research, often by months, sometimes by years. Preprint servers decouple dissemination of research papers from their evaluation and certification by journals, allowing researchers to share work immediately, receive feedback from a much larger audience, and provide evidence of productivity long before formal publication. Launched in 2013 as a non-profit community service, the bioRxiv server has brought preprint practice to the life sciences and recently posted its 64,000th manuscript. The server now receives more than four million views per month and hosts papers spanning all areas of biology. Initially dominated by evolutionary biology, genetics/genomics and computational biology, bioRxiv has been increasingly populated by papers in neuroscience, cell and developmental biology, and many other fields. Changes in journal and funder policies that encourage preprint posting have helped drive adoption, as has the development of bioRxiv technologies that allow authors to transfer papers easily between the server and journals. A bioRxiv user survey found that 42% of authors post their preprints prior to journal submission whereas 37% post concurrently with journal submission. Authors are motivated by a desire to share work early; they value the feedback they receive, and very rarely experience any negative consequences of preprint posting. Rapid dissemination via bioRxiv is also encouraging new initiatives that experiment with the peer review process and the development of novel approaches to literature filtering and assessment.

**Copyright** The copyright holder for this preprint is the author/funder, who has granted bioRxiv a license to display the preprint in perpetuity. It is made available under a CC-BY 4.0 International license.

HOME | SUBMIT | FAQ | BLOG | ALERTS / RSS | ABOUT | CHANNELS

Search  Advanced Search

Previous Next

Posted November 06, 2019.

Download PDF Print/Save Options Supplementary Material Data/Code

Email Share Citation Tools

Tweet Like 41

**COVID-19 SARS-CoV-2 preprints from medRxiv and bioRxiv**

Subject Area

Scientific Communication and Education

**Subject Areas**

All Articles

- Animal Behavior and Cognition
- Biochemistry
- Bioengineering
- Bioinformatics
- Biophysics
- Cancer Biology
- Cell Biology
- Clinical Trials\*
- Developmental Biology
- Ecology
- Epidemiology\*
- Evolutionary Biology
- Genetics
- Genomics
- Immunology
- Microbiology
- Molecular Biology
- Neuroscience
- Paleontology
- Pathology
- Pharmacology and Toxicology
- Physiology
- Plant Biology
- Scientific Communication and Education
- Synthetic Biology
- Systems Biology
- Zoology

\* The Clinical Trials and Epidemiology subject categories are now closed to new submissions following the completion of bioRxiv's clinical research pilot project and launch of the dedicated health sciences server, medRxiv ([submit.medrxiv.org](https://submit.medrxiv.org)). New papers that report results of Clinical Trials must now be submitted to medRxiv. \*Most new Epidemiology papers also should be submitted to medRxiv, but if a paper contains no health-related information, authors may choose to submit it to another bioRxiv subject category (e.g., Genetics or Microbiology).

## Research from all over the globe

**825k**  
authors

**170**  
countries  
& territories

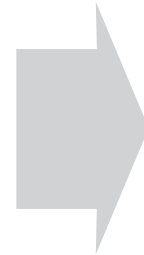

bioRxiv **170k**  
preprints

medRxiv **36k**  
preprints

## Reaching millions every month

**New preprints**  
**4k**

**Abstract views**  
**11m**

medRxiv

*Moving at the speed of science*

The site for rapid COVID-19 scholarly content online

**19k** COVID-19 preprints

For current statistics visit our reports pages:

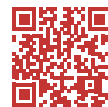

[api.biorxiv.org/reports](https://api.biorxiv.org/reports)

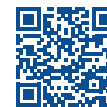

[api.medrxiv.org/reports](https://api.medrxiv.org/reports)

# bioRxiv

for biological research articles

- Research articles reporting new data or analysis in biological sciences

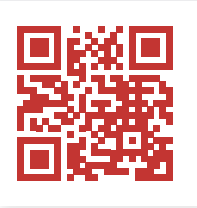

Find out more  
[biorxiv.org](https://biorxiv.org)

# medRxiv

for health science research articles

- Clinical trials and clinical protocols
- Diagnostic tools/medical equipment for humans
- Human epidemiological and/or public health studies

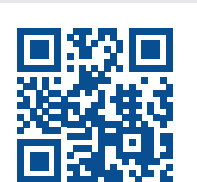

Find out more  
[medrxiv.org](https://medrxiv.org)
